# Supplementary material for: Connexin-Dependent Transfer of cGAMP to Phagocytes Modulates Antiviral Responses
Source: PubMed Central journal article supplement (PMC6989113; doi:10.1128/mbio.03187-19), 2020-01-28
Supplement: mBio.03187-19-sf003.pdf [file mBio.03187-19-sf003.pdf]

**A**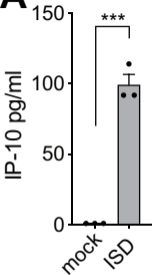**B**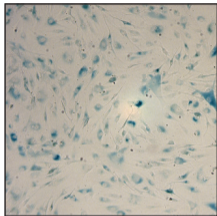**C**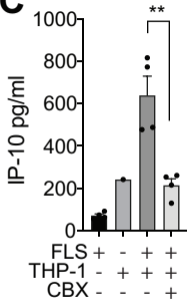**D**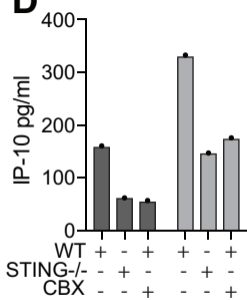

**Supplemental Figure S3**
